# Supplementary material
Source: MDPI journal article supplement (https://www.mdpi.com/2076-3417/13/4/2660)
Supplement: s1 [file s1]

Archive with 3 entries (3 files):
- online_supplements.py.txt
- Readme.txt
- Supplementary-Figure S1.pdf
