# Supplementary material
Source: MDPI journal article supplement (https://www.mdpi.com/2076-3417/13/4/2660)
Supplement: s1 [file s1 › Readme.txt]

Title : An Expandable Yield Prediction Framework Using Explainable Artificial Intelligence for Semiconductor Manufacturing
Authors : Youjin Lee, Yonghan Roh
Contact : youjinleee@g.skku.edu

Included Files:
online_supplements.py

Information:
The original dataset from Samsung Electronics cannot be published because it contains proprietary information.
The code that was used to produce the result data, figures and tables in the paper is provided in online_supplements.py.
The used library versions are listed below.

Python libraries:
python 3.7.9
pandas==1.3.3
numpy ==1.17.3
matplotlib==3.3.4
seaborn==0.11.2
lightgbm==3.3.2
shap==0.40.0
scikit-learn==0.24.2
xgboost==1.5.1
jupyterlab==2.2.6
